# Supplementary material for: Simultaneous Determination of Multiple Contaminants in Chicken Liver Using Dispersive Liquid-Liquid Microextraction (DLLME) Detected by LC-HRMS/MS
Source: MDPI journal article supplement (doi:10.3390/foods12132594), 2023-07-04
Supplement: s1 [file s1]

**Table S1.** Recoveries and RSDs of target compounds at different spiked levels in chicken liver using solid phase extraction.

| Target Compounds      | Added ( $\mu\text{g kg}^{-1}$ ) | Found ( $\mu\text{g kg}^{-1}$ ) | %, Recovery | %, RSD |
|-----------------------|---------------------------------|---------------------------------|-------------|--------|
| Aflatoxin B1          | 2                               | 1.96                            | 98.00       | 9.01   |
|                       | 5                               | 4.7                             | 94.00       | 2.47   |
|                       | 20                              | 19.62                           | 98.10       | 6.95   |
| Albendazole           | 20                              | 17.28                           | 86.40       | 3.26   |
|                       | 50                              | 43.64                           | 87.28       | 2.11   |
|                       | 200                             | 189.37                          | 94.69       | 4.32   |
| Atrazine              | 20                              | 19.87                           | 99.35       | 2.48   |
|                       | 50                              | 44.95                           | 89.90       | 1.13   |
|                       | 200                             | 196.01                          | 98.01       | 5.39   |
| Danofloxacin          | 20                              | 18.01                           | 90.05       | 7.73   |
|                       | 50                              | 48.83                           | 97.66       | 9.71   |
|                       | 200                             | 193.54                          | 96.77       | 8.67   |
| Enrofloxacin          | 20                              | 16.45                           | 82.25       | 3.95   |
|                       | 50                              | 46.19                           | 92.38       | 3.86   |
|                       | 200                             | 183.08                          | 91.54       | 4.35   |
| Fenbendazole          | 20                              | 19.09                           | 95.45       | 7.98   |
|                       | 50                              | 47.71                           | 95.42       | 7.85   |
|                       | 200                             | 182.57                          | 91.29       | 4.81   |
| Mebendazole           | 20                              | 19.18                           | 95.90       | 3.89   |
|                       | 50                              | 46.69                           | 93.38       | 5.46   |
|                       | 200                             | 178.23                          | 89.12       | 7.89   |
| Simazine              | 20                              | 17.75                           | 88.75       | 3.04   |
|                       | 50                              | 43.04                           | 86.08       | 7.48   |
|                       | 200                             | 194.5                           | 97.25       | 4.35   |
| Sulfachloropyridazine | 20                              | 16.74                           | 83.70       | 8.66   |
|                       | 50                              | 48.84                           | 97.68       | 8.65   |
|                       | 200                             | 182.75                          | 91.38       | 8.51   |
| Sulfadiazine          | 20                              | 19.51                           | 97.55       | 8.08   |
|                       | 50                              | 45.7                            | 91.40       | 4.39   |
|                       | 200                             | 190.49                          | 95.25       | 3.66   |
| Sulfamerazine         | 20                              | 19.06                           | 95.29       | 6.39   |
|                       | 50                              | 46.49                           | 92.98       | 6.39   |
|                       | 200                             | 187.36                          | 93.68       | 1.95   |
| Sulfaquinoxaline      | 20                              | 18.53                           | 92.65       | 2.47   |
|                       | 50                              | 47.16                           | 94.32       | 9.85   |
|                       | 200                             | 192.34                          | 96.17       | 6.59   |
| Sulfpuridine          | 20                              | 16.16                           | 80.80       | 3.56   |
|                       | 50                              | 46.04                           | 92.08       | 6.28   |

| Target Compounds | Added ( $\mu\text{g kg}^{-1}$ ) | Found ( $\mu\text{g kg}^{-1}$ ) | %, Recovery | %, RSD |
|------------------|---------------------------------|---------------------------------|-------------|--------|
| Terbutryn        | 200                             | 188.15                          | 94.08       | 4.59   |
|                  | 20                              | 17.75                           | 88.75       | 9.62   |
|                  | 50                              | 48.67                           | 97.34       | 3.13   |
|                  | 200                             | 183.53                          | 91.77       | 5.38   |
| Thiabendazole    | 20                              | 19.14                           | 95.70       | 5.56   |
|                  | 50                              | 49.26                           | 98.52       | 6.39   |
|                  | 200                             | 182.57                          | 91.29       | 7.83   |

**Table S2.** Physicochemical properties of fluoroquinolones, pesticides, sulphonamides, anthelmintics and aflatoxin B1 [52].

| Compound                                                                            | Class           | CAS No.     | pKa                                    | Log P | Molecular mass |
|-------------------------------------------------------------------------------------|-----------------|-------------|----------------------------------------|-------|----------------|
| Aflatoxin B1 (AFB1)                                                                 |                 |             |                                        |       |                |
| 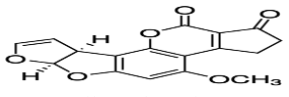   | Mycotoxin       | 1162-65-8   | -4.4 <sup>a</sup> ; 17.79 <sup>b</sup> | 1.60  | 312.0634       |
| Albendazole (ABZ)                                                                   |                 |             |                                        |       |                |
|    | Anthelmintic    | 54965-21-8  | 9.51 <sup>a</sup> ; 4.27 <sup>b</sup>  | 3.22  | 265.0884       |
| Atrazine (ATZ)                                                                      |                 |             |                                        |       |                |
|    | Pesticide       | 1912-24-9   | 14.58 <sup>a</sup> ; 3.38 <sup>b</sup> | 1.54  | 215.0938       |
| Danofloxacin (DFX)                                                                  |                 |             |                                        |       |                |
|    | Fluoroquinolone | 112398-08-0 | 5.65 <sup>a</sup> ; 6.73 <sup>b</sup>  | 0.71  | 357.1489       |
| Enrofloxacin (ENR)                                                                  |                 |             |                                        |       |                |
|  | Fluoroquinolone | 93106-60-6  | 5.55 <sup>a</sup> ; 7.24 <sup>b</sup>  | -0.58 | 359.1645       |
| Mebendazole (MEB)                                                                   |                 |             |                                        |       |                |
|  | Anthelmintic    | 31431-39-7  | 8.44 <sup>a</sup> ; 3.93 <sup>b</sup>  | 3.26  | 296.1030       |
| Fenbendazole (FEB)                                                                  | Anthelmintic    | 43210-67-9  | 9.59 <sup>a</sup> ; 4.06 <sup>b</sup>  | 3.39  | 299.0728       |

| Compound                                                                                                          | Class        | CAS No.  | pKa                                   | Log P | Molecular mass |
|-------------------------------------------------------------------------------------------------------------------|--------------|----------|---------------------------------------|-------|----------------|
| 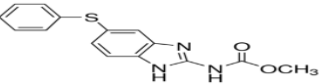<br>Simazine (SIZ)               | Pesticide    | 122-34-9 | 5.28 <sup>a</sup> ; 7.45 <sup>b</sup> | 2.3   | 201.0781       |
| <br>Sulphachloropyridazine (SCP) | Sulphonamide | 803-20-4 | 6.6 <sup>a</sup> ; 2.02 <sup>b</sup>  | 0.97  | 284.0134       |
| <br>Sulphadiazine (SDZ)          | Sulphonamide | 68-35-9  | 6.99 <sup>a</sup> ; 2.01 <sup>b</sup> | 0.25  | 252.0597       |
| <br>Sulphamerazine (SMR)         | Sulphonamide | 127-79-7 | 6.24 <sup>a</sup> ; 2.63 <sup>b</sup> | 0.44  | 249.0519       |
| <br>Sulphapyridine (SPD)         | Sulphonamide | 967-80-6 | 6.79 <sup>a</sup> ; 2.13 <sup>b</sup> | 1.55  | 300.0681       |
| <br>Sulphaquinoxaline (SQ)      |              |          |                                       |       |                |

| Compound                                                                                                 | Class     | CAS No.  | pKa                                    | Log P | Molecular mass |
|----------------------------------------------------------------------------------------------------------|-----------|----------|----------------------------------------|-------|----------------|
| Terbutryn (TER)                                                                                          |           |          |                                        |       |                |
| 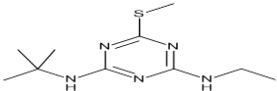<br>Thiabendazole (TBZ) | Pesticide | 886-50-0 | 14.31 <sup>a</sup> ; 6.72 <sup>b</sup> | 3.65  | 241.1361       |
|                         | Pesticide | 148-79-8 | 10.28 <sup>a</sup> ; 4.08 <sup>b</sup> | 2.47  | 201.0360       |

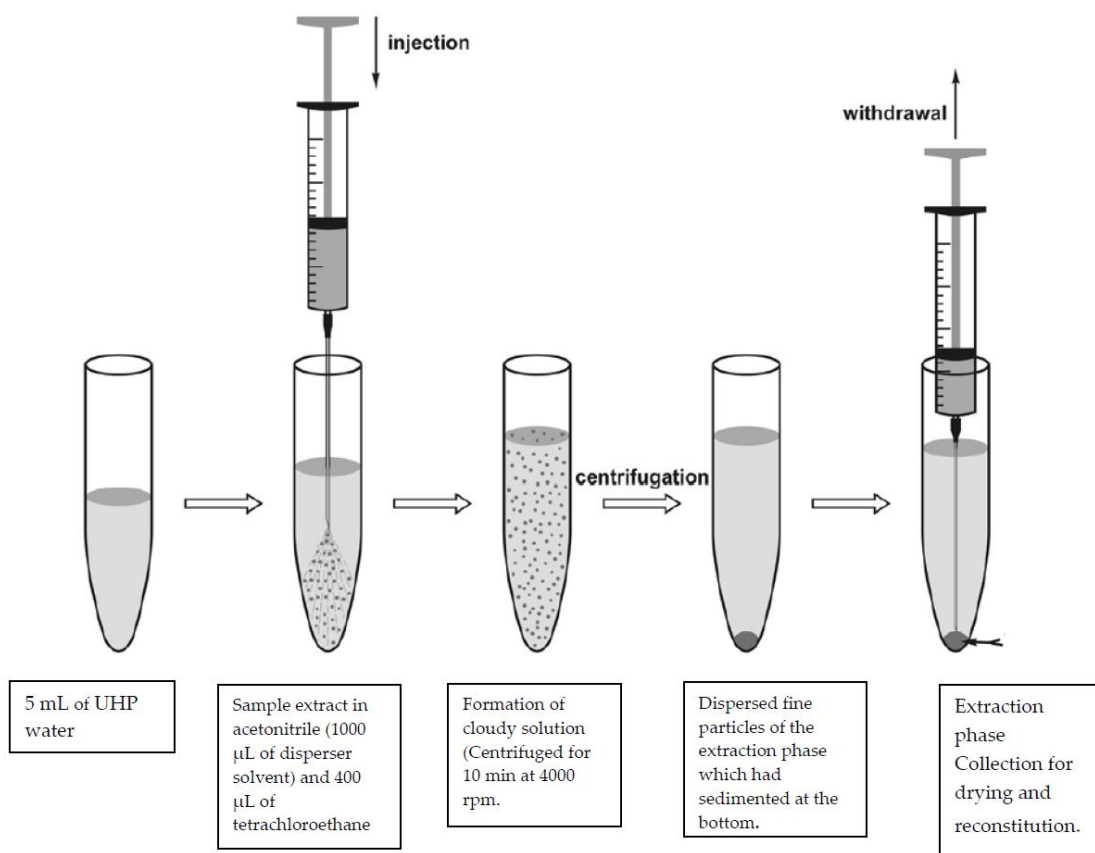

**Figure S1.** Schematic diagram of the procedure for the extraction of mixed multi-class contaminants [52].

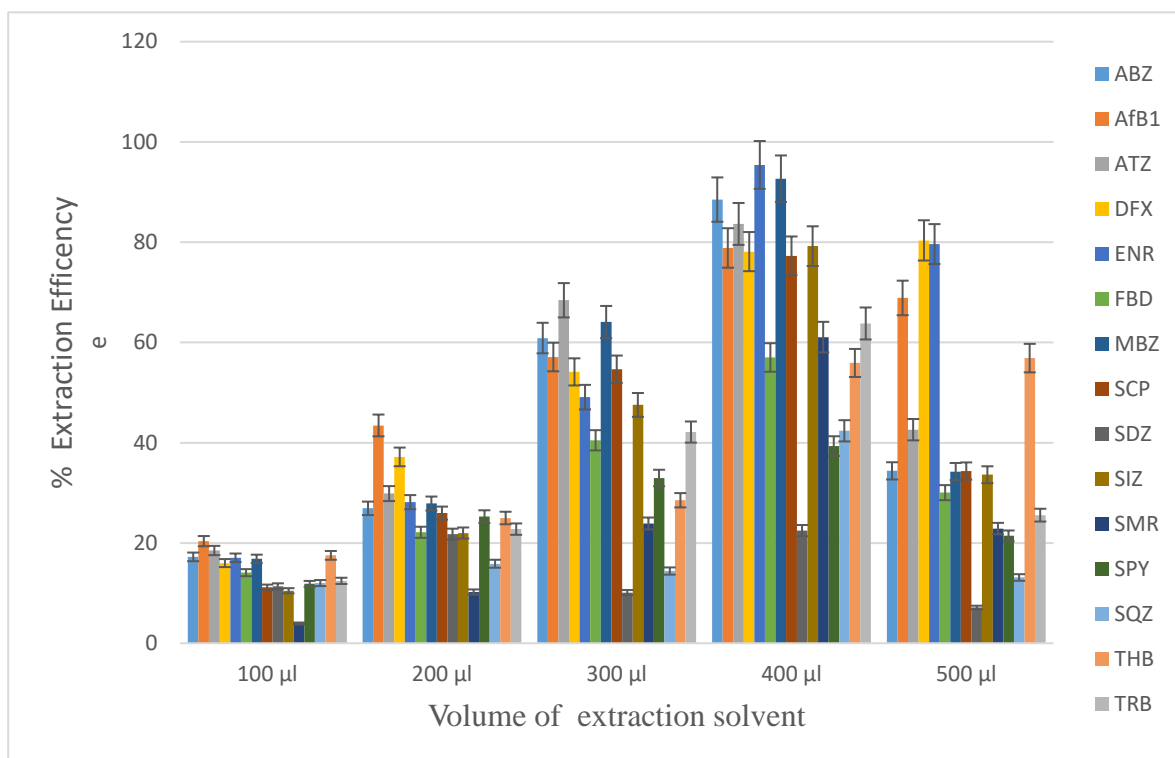

**Figure S2.** Effect of volume of extraction solvent on extraction efficiency in DLLME. Extraction conditions: 5 mL UHP water; varying volumes (100, 200, 300, 400 and 500 µL) of extraction solvent (tetrachloroethane); 1 000 µL of acetonitrile as disperser solvent; concentration of 100 µg kg<sup>-1</sup> for sulphonamides, fluoroquinolones, pesticides, anthelmintics; concentration of 10 µg kg<sup>-1</sup> for aflatoxin B1.

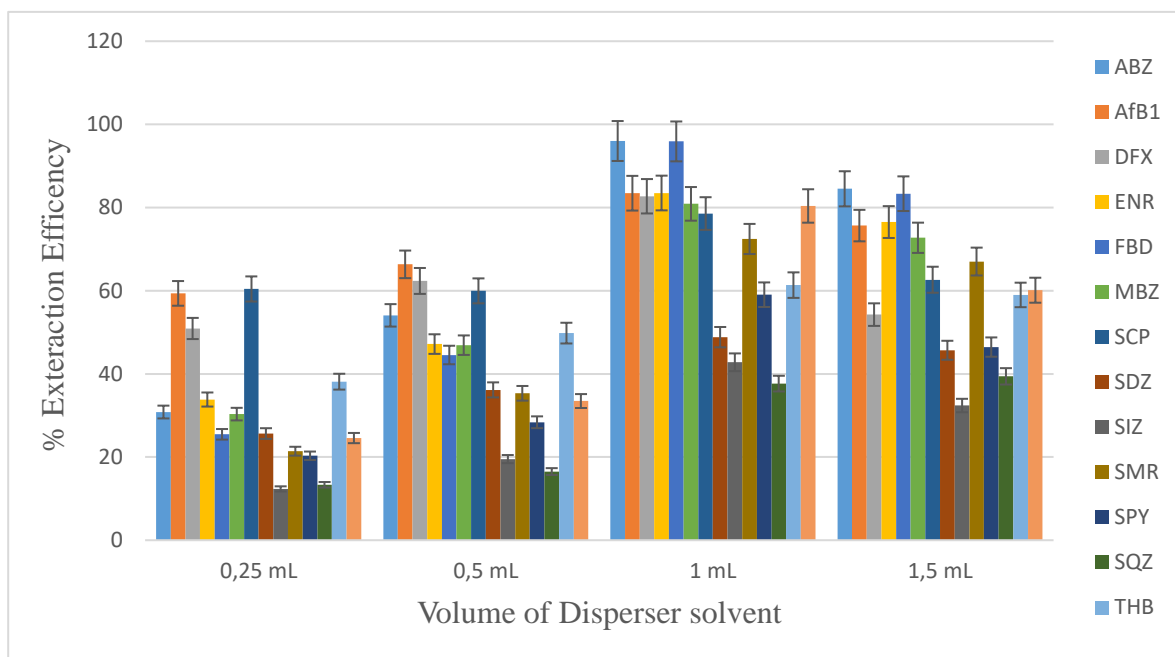

**Figure S3.** Effect of volumes of disperser solvent on extraction efficiencies in DLLME. Extraction conditions: sample, 5 mL of UHP water; 400  $\mu$ L of tetrachloroethane as extraction solvent; varying volumes (250, 500, 1 000 and 1 500  $\mu$ L) of acetonitrile (MeCN) as disperser solvent; concentration of 100  $\mu$ g kg<sup>-1</sup> for sulphonamides, fluoroquinolones, pesticides, anthelmintics; concentration of 10  $\mu$ g kg<sup>-1</sup> for aflatoxin B1.

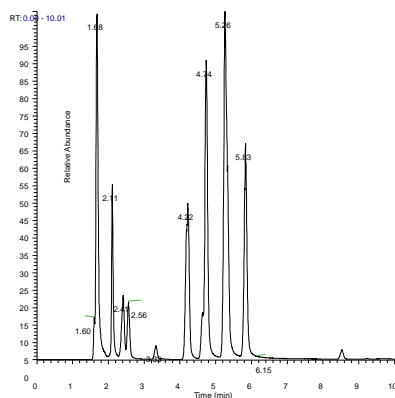

| Compound Name | Retention time | Compound Name         | Retention time |
|---------------|----------------|-----------------------|----------------|
| Aflatoxin B1  | 4.63           | Sulfachloropyridazine | 3.33           |
| Albendazole   | 4.18           | Sulfadiazine          | 2.36           |
| Atrazine      | 5.83           | Sulfamerazine         | 2.56           |
| Danofloxacin  | 1.60           | Sulfaquinoxaline      | 4.18           |
| Enrofloxacin  | 1.68           | Sulpyridine           | 2.41           |
| Fenbendazole  | 5.26           | Terbutryn             | 5.28           |
| Mebendazole   | 4.22           | Thiabendazole         | 2.11           |
| Simazine      | 4.74           |                       |                |

**Figure S4.** Chromatogram of mixed contaminants (sulphonamides, fluoroquinolones, pesticides, anthelmintic and aflatoxin B1).



| Compound Name            | Chromatogram                                                                        | Mass spec                                                                            |
|--------------------------|-------------------------------------------------------------------------------------|--------------------------------------------------------------------------------------|
| Aflatoxin B1             | 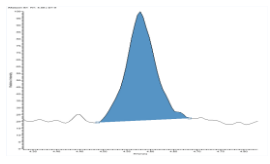   |    |
| Albendazole              |    |    |
| Albendazole-d3           |    |   |
| Atrazine                 |  |  |
| Atrazine -d5             |  |  |
| Danofloxacin             |  |  |
| Danofloxacin-(methyl-d3) |  |  |

|              |                                                                                   |  |
|--------------|-----------------------------------------------------------------------------------|--|
| Enrofloxacin | 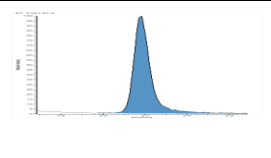 |  |
|--------------|-----------------------------------------------------------------------------------|--|

|                       |                                                                                     |                                                                                      |
|-----------------------|-------------------------------------------------------------------------------------|--------------------------------------------------------------------------------------|
| Simazine-d10          | 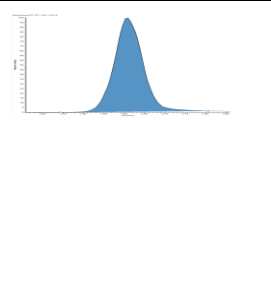   |    |
| Sulfachloropyridazine |    |    |
| Sulfadiazine          |   |   |
| Sulfamerazine         |  |  |
| Sulfamethazine-d4     |  |  |
| Sulfaquinoxaline      |  |  |
| Sulfaquinoxaline-d4   |  |  |
| Sulpyridine           |  |  |

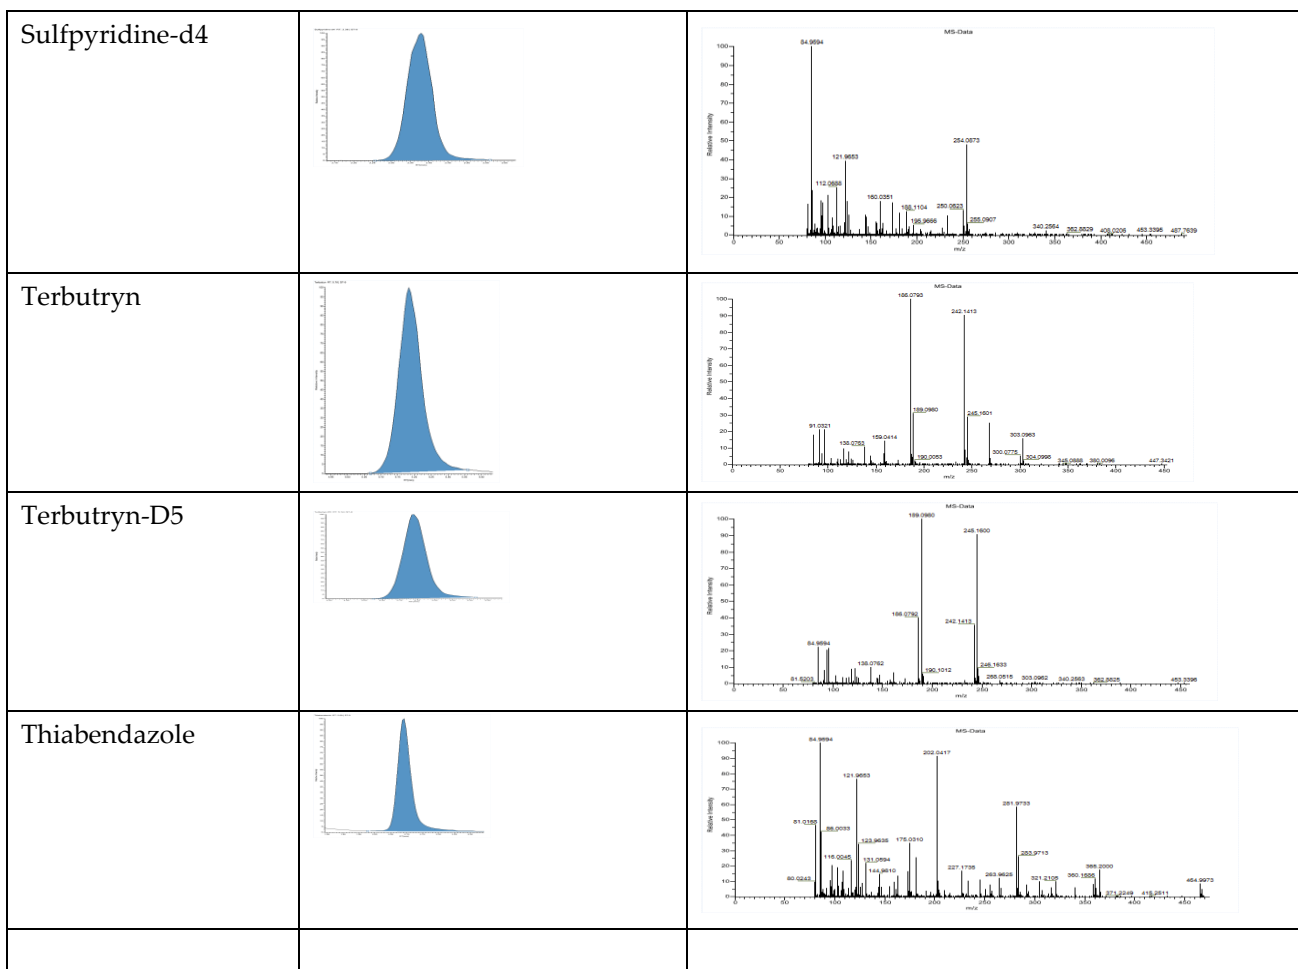

**Figure S5.** Selected ion Chromatograms for individual compounds.
